1 **Construction, validation and application of nocturnal pollen**  
2 **transport networks in an agro-ecosystem: a comparison using**  
3 **microscopy and DNA metabarcoding**

4 *Running title: Constructing nocturnal pollination networks*

5 *Word count: 4676*

6

7 Callum J. Macgregor<sup>1,2,3,4,5</sup>, James J.N. Kitson<sup>1,2</sup>, Richard Fox<sup>3</sup>, Christoph Hahn<sup>2,6</sup>, David H.  
8 Lunt<sup>2</sup>, Michael J.O. Pocock<sup>4</sup>, and Darren M. Evans<sup>1</sup>

9 <sup>1</sup> School of Natural and Environmental Sciences, Newcastle University, Newcastle upon  
10 Tyne, NE1 7RU, UK.

11 <sup>2</sup> School of Environmental Sciences, University of Hull, Cottingham Road, Hull, HU6 7RX,  
12 UK.

13 <sup>3</sup> Butterfly Conservation, Manor Yard, East Lulworth, Wareham, Dorset, BH20 5QP, UK.

14 <sup>4</sup> Centre for Ecology and Hydrology, Maclean Building, Benson Lane, Crowmarsh Gifford,  
15 Wallingford, Oxfordshire, OX10 8BB, UK.

16 <sup>5</sup> Department of Biology, University of York, Wentworth Way, York, YO10 5DD, UK.

17 <sup>6</sup> Institute of Zoology, University of Graz, A-8010 Graz, Austria.

18

19 **Corresponding author:**

20 Callum J. Macgregor

21 Email: callumjmacgregor@gmail.com

22 Tel: (+44) 01904 328632

23 Current address: Department of Biology, University of York, Wentworth Way, York, YO10  
24 5DD, UK.

25

26

## 27 **Abstract**

- 28 1. Moths are globally relevant as pollinators but nocturnal pollination remains poorly  
29 understood. Plant-pollinator interaction networks are traditionally constructed using  
30 either flower-visitor observations or pollen-transport detection using microscopy.  
31 Recent studies have shown the potential of DNA metabarcoding for detecting and  
32 identifying pollen-transport interactions. However, no study has directly compared the  
33 realised observations of pollen-transport networks between DNA metabarcoding and  
34 conventional light microscopy.
- 35 2. Using matched samples of nocturnal moths, we construct pollen-transport networks  
36 using two methods: light microscopy and DNA metabarcoding. Focussing on the  
37 feeding mouthparts of moths, we develop and provide reproducible methods for  
38 merging DNA metabarcoding and ecological network analysis to better understand  
39 species-interactions.
- 40 3. DNA metabarcoding detected pollen on more individual moths, and detected multiple  
41 pollen types on more individuals than microscopy, but the average number of pollen  
42 types per individual was unchanged. However, after aggregating individuals of each  
43 species, metabarcoding detected more interactions per moth species. Pollen-  
44 transport network metrics differed between methods, because of variation in the  
45 ability of each to detect multiple pollen types per moth and to separate  
46 morphologically-similar or related pollen. We detected unexpected but plausible  
47 moth-plant interactions with metabarcoding, revealing new detail about nocturnal  
48 pollination systems.
- 49 4. The nocturnal pollination networks observed using metabarcoding and microscopy  
50 were similar, yet distinct, with implications for network ecologists. Comparisons  
51 between networks constructed using metabarcoding and traditional methods should  
52 therefore be treated with caution. Nevertheless, the potential applications of  
53 metabarcoding for studying plant-pollinator interaction networks are encouraging,  
54 especially when investigating understudied pollinators such as moths.

55

56

## 57 **Keywords**

58 ecological networks, flowers, Lepidoptera, light microscopy, moths, pollen transport

59

60

## 61 Introduction

62 Species interaction networks, which describe the presence and strength of interspecific  
63 interactions within ecosystems (Montoya *et al.*, 2006), are an important tool in understanding  
64 and conserving ecosystem processes and functioning (Tylianakis *et al.*, 2010). Currently,  
65 there is considerable interest in pollination networks, due to ongoing global declines in  
66 pollinating insects (Potts *et al.*, 2010) and their role in reproduction of both wild plants and  
67 crops (Klein *et al.*, 2007; Ollerton *et al.*, 2011).

68 Many flower-visiting animals are not effective pollinators, and proving the existence of an  
69 effective pollination interaction is labour-intensive (King *et al.*, 2013). Consequently, proxies  
70 for pollination are often used to construct plant-pollinator interaction networks, which cannot  
71 strictly be referred to as pollination networks. A commonly-used proxy is flower-visitation,  
72 recorded by directly observing animals visiting flowers. This is effective for daytime  
73 sampling, but is challenging to apply to nocturnal pollinators, such as moths (Lepidoptera;  
74 Macgregor *et al.*, 2015), because observations are difficult and may be biased if assisted by  
75 artificial light. This may explain why plant-pollinator network studies frequently omit nocturnal  
76 moths, even though moths are globally relevant pollinators (Macgregor *et al.*, 2015).

77 An alternative to direct observation is detecting pollen transport, by sampling and identifying  
78 pollen on the bodies of flower-visiting animals; this approach has been used in several  
79 previous studies of nocturnal pollination by moths (Devoto *et al.*, 2011; Banza *et al.*, 2015;  
80 Knop *et al.*, 2017; Macgregor *et al.*, 2017a). By analysing pollen transport, flower-visits  
81 where no pollen is received from the anthers are excluded (Pornon *et al.*, 2016). This  
82 approach can detect more plant-pollinator interactions with lower sampling effort than flower-  
83 visitor observations (Bosch *et al.*, 2009). Studies of pollen transport also permit unbiased  
84 community-level sampling of interactions without requiring decisions about distribution of  
85 sampling effort among flower species, as each pollinator carries a record of its flower-visiting  
86 activities in the pollen on its body (Bosch *et al.*, 2009). Traditionally, pollen identification is  
87 undertaken using light microscopy with a reference collection of known species (e.g. Devoto  
88 *et al.*, 2011). However, identifications made by microscopy can be ambiguous, especially  
89 when distinguishing related species (Galimberti *et al.*, 2014). Accurate, reproducible  
90 identification of pollen sampled from pollinators is necessary to ensure plant-pollinator  
91 networks are free from observer bias.

92 A recent alternative to microscopy is DNA metabarcoding: high-throughput sequencing of  
93 standard reference loci from communities of pooled individuals (Cristescu, 2014). It offers  
94 possibilities to detect interspecific interactions, including plant-pollinator interactions (Evans

95 *et al.*, 2016), and methods are rapidly improving, permitting greater accuracy in species  
96 identification (Bell *et al.*, 2016a) for reducing costs (Kamenova *et al.*, 2017). Studies using  
97 metabarcoding have identified pollen sampled from honey (Hawkins *et al.*, 2015; de Vere *et al.*  
98 *et al.*, 2017) and directly from bees (Galimberti *et al.*, 2014) and flies (Galliot *et al.*, 2017), and  
99 constructed plant-pollinator networks (Bell *et al.*, 2017; Pornon *et al.*, 2017). DNA sequences  
100 have confirmed identities of single pollen grains sampled from moths (Chang *et al.*, 2018),  
101 but no study has applied metabarcoding to nocturnal pollen-transport by moths, where  
102 pollen-transport approaches may be most valuable, given the paucity of existing knowledge  
103 about moth-plant pollination interactions. Metabarcoding reveals more plant-pollinator  
104 interactions than direct flower-visitor observations (Pornon *et al.*, 2016, 2017), but it is  
105 unclear whether this is purely because pollen-transport approaches detect interactions more  
106 efficiently than flower-visitation approaches (Bosch *et al.*, 2009) or whether metabarcoding  
107 offers specific additional benefits. Use of a metabarcoding approach is often justified by the  
108 labour-intensive nature of microscopy-based approaches and the level of expertise required  
109 to identify pollen morphologically (e.g. de Vere *et al.*, 2017). It is frequently suggested that  
110 metabarcoding increases the level of species discrimination compared to traditional  
111 approaches (Bell *et al.*, 2017). Crucially, despite this assertion, no study has directly  
112 compared metabarcoding to traditional microscopy for assessing pollen transport. It is  
113 therefore unknown whether, in studies using a pollen-transport approach, the choice of  
114 detection method (light microscopy or DNA metabarcoding) can alter the realised  
115 observations of plant-pollinator interactions.

116 In this study, we used matched samples of moths to construct nocturnal pollination networks  
117 using two methods: DNA metabarcoding, and the traditional light microscopy approach; and  
118 compared the observed networks, considering the quantity and nature of the interactions  
119 detected and the properties of the networks themselves. We sampled moths in a UK agro-  
120 ecosystem, as our previous study suggests that moths may have greater importance as  
121 pollinators in such systems than generally thought (Macgregor *et al.*, 2017a). Accordingly,  
122 we developed existing pollen-metabarcoding protocols to enable detection of pollen  
123 transported by moths, and integrated molecular advances with ecological network analysis  
124 to provide a reproducible methodology for the improved study of species-interactions. By  
125 providing detailed descriptions of our methods ([dx.doi.org/10.17504/protocols.io/mygc7tw](https://doi.org/10.17504/protocols.io/mygc7tw),  
126 Appendix S1) and archiving all bioinformatic and statistical code  
127 ([dx.doi.org/10.5281/zenodo.1169319](https://doi.org/10.5281/zenodo.1169319)), we present a framework for future studies of  
128 pollination networks using metabarcoding. We discuss the advantages and disadvantages of  
129 each method for assessment of pollen transport by moths and other pollinator taxa, current  
130 limitations and future research directions.

## 131 **Materials and methods**

### 132 *Field sampling*

133 We sampled moths, using light-traps, from four locations in a single farmland site in the East  
134 Riding of Yorkshire, UK (53°51'44" N 0°25'14" W), over eight nights between 30th June and  
135 19th September 2015 (Table S1; full details in Appendix S1). Moths were euthanised and  
136 retained individually. As both pollen-sampling methods are destructive, it was impossible to  
137 directly compare sensitivity by sampling pollen from the same individual moth with both  
138 methods. Instead, we created two matched sub-samples of moths, each containing the  
139 same set of species, and the same number of individuals of each. Pollen-transport by each  
140 sub-sample was analysed using one method (Fig. 1). With both methods, we restricted  
141 pollen sampling to the proboscis, because most moth species coil their proboscides unless  
142 actively feeding (Krenn, 1990). Therefore, the proboscis is unlikely to experience cross-  
143 contamination of pollen through contact with other moths (e.g. whilst in the moth-trap), and  
144 pollen held on the proboscis is probably the result of a flower-visitation interaction.

### 145 *Method 1: light microscopy*

146 A standard approach for pollen sampling was applied (Beattie, 1972), in which 1 mm<sup>3</sup> cubes  
147 of fuchsin jelly were used to swab pollen from the proboscides of moths, and the pollen  
148 examined under a light microscope at 400x magnification. Pollen morphotypes were  
149 identified using a combination of keys (Moore *et al.*, 1994; Kapp *et al.*, 2000) and knowledge  
150 of likely insect-pollinated plant taxa. Morphotypes (equivalent to operational taxonomic units,  
151 OTUs) represented groupings that could not be unambiguously separated to a lower  
152 taxonomic level, and might have contained pollen from multiple species.

### 153 *Method 2: DNA metabarcoding*

154 Protocols for DNA extraction, amplification and sequencing are fully described in Appendix  
155 S1 and archived online ([dx.doi.org/10.17504/protocols.io.mygc7tw](https://doi.org/10.17504/protocols.io.mygc7tw)). In brief, the protocols  
156 were as follows. Moth proboscides were excised using a sterile scalpel. Pollen was removed  
157 from each proboscis by shaking for 10 minutes in HotSHOT lysis reagent (Truett *et al.*, 2000)  
158 at 2000 rpm on a Variomag Teleshake plate shaker (Thermo Scientific, Waltham, MA). The  
159 proboscis was removed using sterile forceps, and the DNA extraction procedure completed  
160 on the remaining solution following Truett *et al.* (2000). Extracted DNA was amplified using a  
161 three-step PCR nested tagging protocol (modified from Kitson *et al.*, n.d. in press; see  
162 Appendix S1). We amplified a custom fragment of the *rbcL* region of chloroplast DNA, which  
163 has been previously used for metabarcoding pollen (Hawkins *et al.*, 2015; Bell *et al.*, 2017)

164 and has a comprehensive reference library for the Welsh flora, representing 76% of the UK  
165 flora (de Vere *et al.*, 2012), available on the International Nucleotide Sequence Database  
166 Collaboration (<http://www.insdc.org/>; GenBank). We used two known binding sites for  
167 reverse primers, *rbcL*-19bR (Hofreiter *et al.*, 2000) and *rbcLr*506 (de Vere *et al.*, 2012), to  
168 produce a working forward and reverse universal primer pair, *rbcL*-3C (*rbcL*-3CF: 5'-  
169 CTGGAGTTCGCCTGAAGAAG-3'; *rbcL*-3CR: 5'-AGGGGACGACCATACTTGTTCA-3').  
170 Primers were validated by successful amplification of DNA extracts from 23/25 plant species  
171 (Table S2). Sequence length varied widely (median: 326 base pairs (bp), range: 96–389 bp);  
172 fragments shorter than 256 bp generally had no match on GenBank. Six control samples  
173 were used to monitor cross-contamination between wells (Table S3).

174 Amplified DNA was sequenced on an Illumina MiSeq, using V2 chemistry. Taxonomic  
175 assignment of MiSeq output was conducted using the metaBEAT pipeline, version 0.97.7  
176 (<https://github.com/HullUni-bioinformatics/metaBEAT>). For reproducibility, all steps were  
177 conducted in Jupyter notebooks; all bioinformatic and statistical code used in this study is  
178 archived online ([dx.doi.org/10.5281/zenodo.1169319](https://doi.org/10.5281/zenodo.1169319)) and procedures are explained in full in  
179 Appendix S1. Taxonomic assignment of sequences was conducted within metaBEAT based  
180 on a BLAST Lowest Common Ancestor approach implemented in MEGAN (Huson *et al.*,  
181 2007). We chose to conduct taxonomic assignment with BLAST because it is among the  
182 most widely-used taxonomic assignment tools, and *blastn* specifically has a proven capacity  
183 to discriminate between UK plant species using the *rbcL* locus (de Vere *et al.*, 2012). We  
184 used a curated database of reference sequences from plausibly-present plant species  
185 previously recorded in the vice-county of South-east Yorkshire (reference list of species  
186 archived at [dx.doi.org/10.5281/zenodo.1169319](https://doi.org/10.5281/zenodo.1169319)).

187 To eliminate the risk of cross-well contamination, we established a threshold for minimum  
188 read depth of 50 reads, per assignment, per well. The maximum read depth in any negative  
189 control well was 47, and the maximum read depth in any positive control well of sample  
190 assignments was 33 (Table S3). Therefore, this threshold was adequate to remove sample  
191 reads from positive and negative controls. Within each well, any assignment with a read  
192 depth below 50 was reset to 0 prior to statistical analysis; this resulted in some plant OTUs  
193 being removed entirely from the dataset (however, these OTUs are indicated in Table 1).

#### 194 *Curation of data*

195 We harmonised the plant identifications from each method (OTUs from metabarcoding and  
196 morphotypes from microscopy) to produce a single list of plants consistent across both  
197 methods (Table 1). Specifically, for metabarcoding, we revised family-level assignments

198 made by BLAST, inspecting the range of species-level matches to identify clear taxonomic  
199 clusters within the families. For microscopy, we attempted to re-identify pollen morphotypes  
200 using images of pollen from species identified by metabarcoding for additional reference  
201 (see Appendix S1). Microscopic photographs of pollen were sourced from two online  
202 repositories of pollen images: Pollen-Wiki  
203 (<http://pollen.tstebler.ch/MediaWiki/index.php?title=Pollenatlas>) and the Pollen Image Library  
204 (<http://www.saps.plantsci.cam.ac.uk/pollen/index.htm>).

### 205 *Comparison of methods and statistical analysis*

206 We tested for differences between the two identification methods, examining whether  
207 sampling method affected the likelihood of detecting (i) pollen on individual moths; (ii) more  
208 than one pollen species on individuals; (iii) pollen on moth species (individuals combined);  
209 and whether sampling method affected the number of pollen types detected (iv) per  
210 individual moth; and per moth species, using (v) observed richness and (vi) true richness  
211 estimated using the Chao2 estimator (Chao, 1987). We used generalised linear mixed-  
212 effects models (GLMMs), with sampling method as a fixed effect. In individual-level  
213 analyses, we used date/light-trap combination ('trap ID') as a random effect, whilst in  
214 species-level analyses, we used moth species as a random effect to treat the data as pairs  
215 of observations (one observation, per method, per moth species). We tested significance of  
216 fixed effects using either Likelihood Ratio Tests or Type III ANOVA, depending on error  
217 distribution. Analysis was carried out with R version 3.3.2 (R Core Team, 2016); all code is  
218 archived at [dx.doi.org/10.5281/zenodo.1169319](https://doi.org/10.5281/zenodo.1169319).

### 219 *Sampling completeness and networks*

220 For both methods, we estimated sampling completeness of interactions, following Macgregor  
221 *et al.* (2017b). For each method, we estimated the total number of pollen types (interaction  
222 richness) for each insect species with the Chao2 estimator (Chao, 1987), using the R  
223 package *vegan* (Oksanen *et al.*, 2015). We calculated interaction sampling completeness for  
224 each species as  $100 \times (\text{observed interactions}) / (\text{estimated interactions})$  for each species.  
225 Finally, we calculated the mean interaction sampling completeness of all species, weighted  
226 by estimated interaction richness of each species.

227 We constructed pollen-transport networks from the interaction data. We used presence of  
228 interactions between individual moths and plant taxa, rather than strength of individual  
229 interactions, because read depth (metabarcoding) and pollen count (microscopy) are not  
230 equivalent. We measured interaction frequency by counting interactions across all  
231 individuals in each moth species; interaction frequency correlates positively with true



232 interaction strength in mutualistic networks (Vázquez *et al.*, 2005). We calculated several  
233 quantitative metrics, as follows, to describe the diversity and specialisation of interactions  
234 forming each network. Improved detection of interactions could increase the complexity of  
235 the network, so we calculated two measures of network complexity: linkage density (average  
236 no. links per species) and connectance (proportion of possible interactions in the network  
237 that are realized). Likewise, improved detection of plant species with the same set of  
238 pollinator species could alter consumer-resource asymmetry and perceived specialization of  
239 species in the network, so we calculated H2' (a frequency-based index that increases with  
240 greater specialization), generality of pollinators, and of plants (average no. links to plant  
241 species per pollinator species, and *vice versa*). Finally, the resilience of the network to  
242 cascading species loss may be influenced by its complexity (Dunne *et al.*, 2002), so we  
243 measured the robustness of each network (mean robustness across 1000 bootstrapped  
244 simulations of pollinator species loss). For comparison, we repeated all network analyses  
245 with plant identities aggregated at family-level, because the methods might differ in their  
246 ability to distinguish closely-related species. Networks were analysed using the package  
247 bipartite (Dormann *et al.*, 2009) and plotted using Food Web Designer 3.0 (Sint & Traugott,  
248 2016). As we could only construct one network for each method, we recorded obvious  
249 differences between the metrics for each network but could not statistically assess the  
250 significance of those differences.

## 251 **Results**

### 252 *Summary*

253 In total, we caught 683 moths of 81 species, generating two matched sub-samples, each  
254 containing 311 moths of 41 species (Table S4). We detected pollen on 107 individual moths  
255 with metabarcoding (34% of the sub-sample) and 70 (23%) with microscopy. We initially  
256 identified 20 plant morphotypes in the microscopy sample and 25 OTUs in the  
257 metabarcoding sample (Table 1). After harmonising these we recorded 33 plant identities (at  
258 varying taxonomic resolution), of which 18 were detected with both methods, 11 with  
259 metabarcoding only (including three which failed to meet the minimum read depth threshold  
260 in any sample), and four by microscopy only.

### 261 *Statistical comparisons between methods*

262 Metabarcoding was significantly more likely than microscopy to detect pollen (Fig. 2) on  
263 individual moths ( $\chi^2 = 10.95$ ,  $P < 0.001$ ), and to detect more than one pollen type on  
264 individual moths ( $\chi^2 = 12.00$ ,  $P < 0.001$ ). However, with non-pollen-carrying moths excluded,  
265 the methods did not differ in the number of pollen types detected per individual moth ( $\chi^2 =$

266 1.12,  $P = 0.290$ ). With data aggregated per moth species, the methods did not differ in the  
267 likelihood of detecting pollen ( $\chi^2 = 0.37$ ,  $P = 0.545$ ), but metabarcoding detected significantly  
268 more pollen types per moth species ( $\chi^2 = 18.09$ ,  $P < 0.001$ ); this difference was non-  
269 significant when the estimate of true interaction richness was used ( $\chi^2 = 3.62$ ,  $P = 0.057$ ;  
270 Table S5).

### 271 *Construction and analysis of networks*

272 For each method, we constructed a quantitative pollen-transport network (Fig. 3). The  
273 estimated sampling completeness of interactions was higher for the microscopy network  
274 (75.7%) than the metabarcoding network (43.2%). Some network metrics differed markedly  
275 between the two methods (Fig. 4), though no statistical comparison was appropriate.  
276 Specifically, linkage density and generality of pollinators were higher in the metabarcoding  
277 network than the microscopy network, but all other metrics were similar. With plant  
278 assignments aggregated at family level, the metabarcoding network had higher generality of  
279 pollinators and lower generality of plants than the microscopy network (Table S6).

## 280 **Discussion**

### 281 *Methodological comparison*

282 Our realised observations of the plant-pollinator system were generally similar between the  
283 DNA-based (metabarcoding) and microscopy-based methods for detecting and identifying  
284 pollen-transport by moths, but nonetheless showed some key differences. Metabarcoding  
285 detected more pollen OTUs in total than microscopy, detected pollen on a greater proportion  
286 of individual moths, and was more likely to detect multiple pollen OTUs on a moth. When  
287 moths were aggregated to species level, metabarcoding detected more pollen types in total  
288 per moth species.

289 We observed differences between the networks detected by each method, which can be  
290 attributed to metabarcoding detecting more separate species within some plant families, and  
291 detecting interactions with more plant families per pollinator species. This is revealed by the  
292 higher generality of pollinators in the fully-resolved metabarcoding network than its  
293 equivalent microscopy network, and the lesser increase in generality of pollinators,  
294 combined with lower generality of plants, in the family-level metabarcoding network than its  
295 equivalent (Fig. 4). Additionally, linkage density was higher for metabarcoding than  
296 microscopy in the fully-resolved networks, but not in the family-level networks (Fig. 4).

297 Estimated sampling completeness of interactions differed conspicuously between networks  
298 (Table S6). Despite containing more interactions, the metabarcoding network was estimated  
299 to be less completely sampled than the microscopy network. This is probably because  
300 metabarcoding detected more ‘rare’ interactions (‘singletons’, detected only once), being  
301 more effective at distinguishing morphologically-similar pollen. This would result in a higher  
302 ratio of singletons to doubletons (interactions detected twice) and therefore a proportionally  
303 greater estimated value of interaction richness. This demonstrates that sampling method can  
304 substantially affect estimation of sampling completeness of interactions in network studies.

### 305 *Pollen transported by moths*

306 We identified several plants using metabarcoding that were not initially identified as the  
307 same species by microscopy. Because many plants have morphologically-similar pollen, we  
308 conservatively chose not to identify novel moth-flower associations by microscopy unless the  
309 identification was unambiguous. Among the plants initially identified only by metabarcoding  
310 were species for which moths were not previously recorded in the literature as pollinators or  
311 flower-visitors (Macgregor *et al.*, 2015), highlighting that much is still unknown about  
312 pollination by moths. Some of these fitted the moth-pollination ‘syndrome’ (Grant, 1983),  
313 being white and fragrant: *Sambucus nigra* (Adoxaceae), *Philadelphus coronarius*  
314 (Hydrangeaceae), *Filipendula ulmaria* (Rosaceae) and *Ligustrum vulgare* (Oleaceae; though  
315 not *Syringa vulgaris*, not separable in this study). However, others did not and are typically  
316 associated with other pollinators: for example, *Polemonium caeruleum* (Polemoniaceae) and  
317 *Trifolium* spp. (Fabaceae) are visited by bees (Palmer-Jones *et al.*, 1966; Zych *et al.*, 2013),  
318 *Verbena officinalis* (Verbenaceae) is most likely visited by bees and butterflies (Perkins *et*  
319 *al.*, 1975), whilst species of *Epipactis* (Orchidaceae) are generalist, with previously-known  
320 visitors including diurnal Lepidoptera (Jakubska-Busse & Kadej, 2011).

321 We found pollen from plants that, in this region, are chiefly associated with domestic  
322 gardens, including two species of Hydrangeaceae, species from the tribe Mentheae  
323 (Lamiaceae; includes many species grown as culinary herbs, though wild species might also  
324 have occurred), *Buddleja davidii* (Scrophulariaceae; though a railway ran adjacent to the  
325 farm and *B. davidii* is widely naturalised along railways in the UK) and *Verbena officinalis*  
326 (Verbenaceae). Individual moths may have carried pollen several hundred metres from the  
327 closest gardens to the field site. This provides new evidence to support previous suggestions  
328 that moths could play an important role in providing gene flow among plant populations at  
329 the landscape-scale (Miyake & Yahara, 1998; Young, 2002; Barthelmess *et al.*, 2006), and  
330 even at continental scales for species of moths that undergo long-distance migrations

331 (Chang *et al.*, 2018). Such gene flow could provide benefits from nocturnal pollination even  
332 to plant species that are primarily diurnally-pollinated and not pollination-limited.

333 Finally, we detected several insect-pollinated crop species (only some of which require  
334 pollination for crop production): specifically, soybean *Glycine max* and pea *Pisum sativum*  
335 (Fabaceae), potato *Solanum tuberosum* (Solanaceae), and *Brassica/Raphanus* sp. (includes  
336 oil-seed rape; Brassicaceae). Floral phenology suggests *Prunus* sp. (Rosaceae) was likely  
337 to be cherry (*P. avium*, *P. cerasus* or a hybrid) rather than wild *P. spinosa*. Similarly, *Rubus*  
338 sp. (Rosaceae) could have been wild blackberry (matching to *R. caesius*, *R. plicatus* and *R.*  
339 *ulmifolius*) but also matched raspberry *R. idaeus*. There is currently an extreme paucity of  
340 evidence in the existing global literature to support a role of moths in providing pollination  
341 services by fertilizing economically-valuable crops (Klein *et al.*, 2007; Macgregor *et al.*,  
342 2015). Although our findings do not prove that any of the crops recorded receive significant  
343 levels of nocturnal pollination by moths, they do highlight a vital and urgent need for further  
344 research into the potential role of moths as pollinators of agricultural crop species.

#### 345 *Current methodological limitations*

346 We identified limitations with both methods, relating to the accuracy and taxonomic  
347 resolution of pollen identification and the non-quantitative interaction data they generated.

348 Firstly, there was little initial overlap between identifications made by each method (of 20  
349 initial assignments from microscopy and 25 from metabarcoding, only 3 plant identifications  
350 were shared between methods at genus- or species-level). Because we applied the methods  
351 to separate samples of moths, some differences were expected between the pollen species  
352 transported. In two cases (*Silene* and *Tilia*), species identified by microscopy were discarded  
353 from the metabarcoding assignments by application of the 50-reads threshold. Both species  
354 had very low abundance in microscopy samples (<20 pollen grains per sample), suggesting  
355 precautions against cross-sample contamination with metabarcoding might mask detection  
356 of low-abundance pollen. The remaining mismatches were most probably misidentifications  
357 by one or other method. Using images of pollen from species identified by metabarcoding as  
358 a reference for microscopy, we re-identified several pollen morphotypes, increasing  
359 agreement between the methods (19 identifications matched across methods, of which 10  
360 were at genus- or species-level; Table 1). Misidentifications were arguably more likely under  
361 microscopy than metabarcoding, due to the conservative approach used when applying  
362 BLAST and the difficulty of unambiguously identifying pollen by microscopy.

363 Secondly, several assignments made with metabarcoding were not resolved beyond family-  
364 level. Although *rbcL* is a popular marker region for plant barcoding (Hawkins *et al.*, 2015)

365 and has been shown to identify over 90% of Welsh plants to at least genus-level using blastn  
366 (de Vere *et al.*, 2012), interspecific sequence diversity within *rbcL* is nonetheless extremely  
367 low within some families (e.g. Apiaceae; Liu *et al.*, 2014). In some cases, reference  
368 sequences from multiple genera did not differ across our entire fragment, leading BLAST to  
369 match query sequences to species from several genera with equal confidence. Such  
370 instances could not have been further resolved using our fragment, even by alternative  
371 assignment methods. Sequencing a longer fragment might increase interspecific sequence  
372 variation; improvements in sequencing technology may facilitate accurate sequencing of  
373 such longer amplicons (Hebert *et al.*, 2017). Using another locus than *rbcL* might improve  
374 taxonomic resolution; loci including ITS2 and *matK* are also used to metabarcode pollen  
375 (Bell *et al.*, 2016b). Sequencing two or more of these loci simultaneously might also improve  
376 assignment resolution (de Vere *et al.*, 2012), though at greater cost.

377 Thirdly, some studies have weighted interactions in networks using the number of pollen  
378 grains transported, as a proxy for interaction strength (e.g. Banza *et al.*, 2015). This  
379 approach is impossible with metabarcoding, as the number of pollen grains in a sample does  
380 not correlate with read depth (Pornon *et al.*, 2016), and metabarcoding cannot definitively  
381 distinguish pollen from other sources of plant DNA (e.g. residual nectar on mouthparts).  
382 However, an insect's pollen load also may not be a true indicator of its efficacy as a  
383 pollinator (Ballantyne *et al.*, 2015); pollinator effectiveness differs between pairwise  
384 interactions through variation in floral morphology, pollinator morphology and behaviour,  
385 location of pollen on the pollinator's body, and other temporal and spatial factors besides the  
386 quantity of pollen transported. Instead, interaction frequency (counting occurrences of an  
387 interaction, but disregarding individual interaction strength) predicts the relative strength of  
388 pollination interactions well (Vázquez *et al.*, 2005), and was successfully generated with both  
389 microscopy and metabarcoding in our study.

### 390 *Merging metabarcoding and pollination network analysis*

391 Following several recent studies which have constructed diurnal plant-pollinator networks  
392 using DNA metabarcoding (Bell *et al.*, 2017; Pornon *et al.*, 2017), we have further  
393 demonstrated the potential of metabarcoding by using it to construct nocturnal pollen-  
394 transport networks for the first time (Fig. 3). We provide a detailed and reproducible  
395 methodology to integrate molecular advances and ecological network analysis. Our results  
396 clearly demonstrate that the capacity of metabarcoding to generate pollen-transport  
397 interaction data is comparable to that of previously-used methods, such as microscopy.  
398 Additionally, metabarcoding may carry several practical advantages over flower-visitor  
399 observations or microscopy for studies analysing pollination networks.

400 One such advantage is that metabarcoding is reproducible across studies, pollinator guilds,  
401 and ecosystems. It is freed from observer biases inherent both in morphological identification  
402 of pollen, and in other means of detecting pollination interactions such as flower-visitor  
403 observations, where distribution of sampling effort among flower species can affect network  
404 structure (Gibson *et al.*, 2011) and sampling often focuses on a subset of the floral  
405 assemblage (e.g. Tiusanen *et al.*, 2016). Metabarcoding can be conducted without system-  
406 specific expertise in morphological pollen identification, or prior knowledge about locally-  
407 present plants or likely interactions (although such information can be used, if available and  
408 robust, to increase the taxonomic resolution of species identifications). Metabarcoding may  
409 reveal previously unsuspected detail in networks (Pornon *et al.*, 2017), especially those  
410 involving moths or other under-studied pollinator taxa.

411 Metabarcoding may also allow more efficient processing of samples, and therefore the  
412 analysis of larger numbers of samples, than microscopy (Fig. 5). Most pollination-network  
413 studies have focused on evaluating a single network, or a small number of networks under  
414 variant conditions (e.g. Burkle *et al.*, 2013). Constructing multiple replicated networks across  
415 a range of treatments, sites or time points, and testing for structural differences (e.g.  
416 Lopezaraiza–Mikel *et al.*, 2007), is a powerful alternative, but can be hampered by the  
417 difficulty of generating enough data for multiple, well-sampled networks. For metabarcoding,  
418 investment mainly scales per-plate ( $\leq 96$  samples) rather than per-sample (Derocles *et al.*,  
419 2018), whereas for microscopy, investment of materials and especially time increases  
420 linearly for every sample, although sample-processing speed might increase slightly after an  
421 initial period of learning (Fig. 5). Importantly, this increased efficiency is coupled with  
422 increased reproducibility, as molecular tools treat all samples identically regardless of their  
423 complexity.

424 Finally, DNA metabarcoding can streamline the generation of suitable data for incorporating  
425 phylogenetic information into ecological networks (Evans *et al.*, 2016). Recent studies have  
426 found significant relationships between phylogenetic and resource overlap in mutualistic and  
427 antagonistic networks (Rezende *et al.*, 2007; Elias *et al.*, 2013; Peralta *et al.*, 2015);  
428 metabarcoding permits simultaneous generation of both interaction and relatedness data.

## 429 *Conclusions*

430 In this study, we constructed pollen-transport networks using matched samples of moths to  
431 compare between two methods for detecting and identifying pollen: DNA metabarcoding and  
432 traditional light microscopy. We showed that the state-of-the-art DNA metabarcoding  
433 approach is capable of generating pollen-transport interaction networks that are similar to

434 those detected using microscopy. Indeed, with metabarcoding, we detected pollen on more  
435 individual moths and detected more pollen types per moth species. These differences  
436 indicate that direct comparisons between networks constructed using metabarcoding and  
437 those constructed using traditional methods such as microscopy should be treated with  
438 appropriate caution, but a combination of both metabarcoding and traditional methods may  
439 provide the most detailed information (Wirta *et al.*, 2014). Metabarcoding additionally  
440 revealed a range of previously undocumented moth-plant interactions, and provided new  
441 evidence for two possible benefits of nocturnal pollination: landscape-scale provision of plant  
442 gene flow, and potential provision of the pollination ecosystem service. The metabarcoding  
443 approach has considerable potential for studying pollen-transport networks and species-  
444 interactions more generally.

## 445 **Acknowledgements**

446 This work was supported by the Natural Environment Research Council and Butterfly  
447 Conservation (Industrial CASE studentship awarded to C.J.M., Project Reference:  
448 NE/K007394/1) and was conducted with ethical approval from the University of Hull  
449 (Approval Code U074). We thank T. Hall for her permission to sample moths at Molescroft  
450 Grange Farm. We thank A. Lucas and N. de Vere for useful discussions prior to  
451 commencing labwork, and J. Downs for assistance with fieldwork. E. Moss created the moth  
452 image in Fig. 1.

## 453 **Contribution of authors**

454 The experiment was conceived by C.J.M. under supervision by D.M.E., M.J.O.P and R.F.  
455 and designed by those authors with D.H.L. and J.J.N.K. Field and laboratory work was  
456 conducted by C.J.M. with advice from J.J.N.K. The metaBEAT pipeline was created by C.H.  
457 and metabarcoding data was processed and analysed by C.J.M., with advice from C.H. The  
458 statistical analysis was conducted by C.J.M. All authors contributed to preparing the  
459 manuscript and gave final approval for publication.

## 460 **Data Accessibility Statement**

- 461 • Raw DNA sequence reads: Sequence Read Archive, accession number SRP102977.
- 462 • Bioinformatic and analytical scripts: Zenodo, doi: [10.5281/zenodo.1169319](https://doi.org/10.5281/zenodo.1169319).
- 463 • Processed interaction data: Dryad doi: ...(upon acceptance)

## 464 **References**

- 465 Ballantyne, G., Baldock, K.C.R. & Willmer, P.G. (2015) Constructing more informative plant-  
466 pollinator networks: visitation and pollen deposition networks in a heathland plant  
467 community. *Proceedings of the Royal Society B: Biological Sciences*, **282**, 20151130.
- 468 Banza, P., Belo, A.D.F. & Evans, D.M. (2015) The structure and robustness of nocturnal  
469 Lepidopteran pollen-transfer networks in a Biodiversity Hotspot. *Insect Conservation and*  
470 *Diversity*, **8**, 538–546.
- 471 Barthelmess, E.L., Richards, C.M. & McCauley, D.E. (2006) Relative effects of nocturnal vs  
472 diurnal pollinators and distance on gene flow in small *Silene alba* populations. *The New*  
473 *Phytologist*, **169**, 689–698.
- 474 Beattie, A.J. (1972) A technique for the study of insect-borne pollen. *The Pan-Pacific*  
475 *Entomologist*, **47**, 82.
- 476 Bell, K.L., Burgess, K.S., Okamoto, K.C., Aranda, R. & Brosi, B.J. (2016a) Review and future  
477 prospects for DNA barcoding methods in forensic palynology. *Forensic Science*  
478 *International: Genetics*, **21**, 110–116.
- 479 Bell, K.L., Fowler, J., Burgess, K.S., Dobbs, E.K., Gruenewald, D., Lawley, B., *et al.* (2017)  
480 Applying pollen DNA metabarcoding to the study of plant–pollinator interactions. *Applications*  
481 *in Plant Sciences*, **5**, 1600124.
- 482 Bell, K.L., Vere, N. de, Keller, A., Richardson, R.T., Gous, A., Burgess, K.S., *et al.* (2016b)  
483 Pollen DNA barcoding: current applications and future prospects. *Genome*, **59**, 629–640.
- 484 Bosch, J., González, A.M.M., Rodrigo, A. & Navarro, D. (2009) Plant-pollinator networks:  
485 adding the pollinator’s perspective. *Ecology Letters*, **12**, 409–419.
- 486 Burkle, L.A., Marlin, J.C. & Knight, T.M. (2013) Plant-pollinator interactions over 120 years:  
487 loss of species, co-occurrence, and function. *Science*, **339**, 1611–1615.
- 488 Chang, H., Guo, J., Fu, X., Liu, Y., Wyckhuys, K.A.G., Hou, Y., *et al.* (2018) Molecular-  
489 assisted pollen grain analysis reveals spatiotemporal origin of long-distance migrants of a  
490 noctuid moth. *International Journal of Molecular Sciences*, **19**, 567.
- 491 Chao, A. (1987) Estimating the population size for capture-recapture data with unequal  
492 catchability. *Biometrics*, **43**, 783–791.
- 493 Cristescu, M.E. (2014) From barcoding single individuals to metabarcoding biological  
494 communities: towards an integrative approach to the study of global biodiversity. *Trends in*  
495 *Ecology & Evolution*, **29**, 566–571.



- 496 Derocles, S.A.P., Bohan, D.A., Dumbrell, A.J., Kitson, J.J.N., Massol, F., Pauvert, C., *et al.*  
497 (2018) Biomonitoring for the 21st Century: integrating Next-Generation Sequencing into  
498 Ecological Network Analysis. In *Advances in Ecological Research*. Academic Press.
- 499 Devoto, M., Bailey, S. & Memmott, J. (2011) The “night shift”: nocturnal pollen–transport  
500 networks in a boreal pine forest. *Ecological Entomology*, **36**, 25–35.
- 501 Dormann, C.F., Frund, J., Bluthgen, N. & Gruber, B. (2009) Indices, graphs and null models:  
502 analyzing bipartite ecological networks. *The Open Ecology Journal*, **2**, 7–24.
- 503 Dunne, J.A., Williams, R.J. & Martinez, N.D. (2002) Network structure and biodiversity loss  
504 in food webs: robustness increases with connectance. *Ecology Letters*, **5**, 558–567.
- 505 Elias, M., Fontaine, C. & Veen, F.J.F. van. (2013) Evolutionary history and ecological  
506 processes shape a local multilevel antagonistic network. *Current Biology*, **23**, 1355–1359.
- 507 Evans, D.M., Kitson, J.J.N., Lunt, D.H., Straw, N.A. & Pocock, M.J.O. (2016) Merging DNA  
508 metabarcoding and ecological network analysis to understand and build resilient terrestrial  
509 ecosystems. *Functional Ecology*, **30**, 1904–1916.
- 510 Galimberti, A., De Mattia, F., Bruni, I., Scaccabarozzi, D., Sandionigi, A., Barbuto, M., *et al.*  
511 (2014) A DNA barcoding approach to characterize pollen collected by honeybees. *PLoS*  
512 *One*, **9**, e109363.
- 513 Galliot, J.-N., Brunel, D., Bérard, A., Chauveau, A., Blanchetête, A., Lanore, L., *et al.* (2017)  
514 Investigating a flower-insect forager network in a mountain grassland community using  
515 pollen DNA barcoding. *Journal of Insect Conservation*, **21**, 827–837.
- 516 Gibson, R.H., Knott, B., Eberlein, T. & Memmott, J. (2011) Sampling method influences the  
517 structure of plant–pollinator networks. *Oikos*, **120**, 822–831.
- 518 Grant, V. (1983) The systematic and geographical distribution of hawkmoth flowers in the  
519 temperate North American flora. *Botanical Gazette*, **144**, 439–449.
- 520 Hawkins, J., Vere, N. de, Griffith, A., Ford, C.R., Allainguillaume, J., Hegarty, M.J., *et al.*  
521 (2015) Using DNA metabarcoding to identify the floral composition of honey: a new tool for  
522 investigating honey bee foraging preferences. *PLoS One*, **10**, e0134735.
- 523 Hebert, P.D.N., Braukmann, T.W.A., Prosser, S.W.J., Ratnasingham, S., deWaard, J.R.,  
524 Ivanova, N.V., *et al.* (2017) A Sequel to Sanger: amplicon sequencing that scales. *bioRxiv*,  
525 doi: 10.1101/191619.
- 526 Hofreiter, M., Poinar, H.N., Spaulding, W.G., Bauer, K., Martin, P.S., Possnert, G., *et al.*  
527 (2000) A molecular analysis of ground sloth diet through the last glaciation. *Molecular*  
528 *Ecology*, **9**, 1975–1984.

- 529 Huson, D.H., Auch, A.F., Qi, J. & Schuster, S.C. (2007) MEGAN analysis of metagenomic  
530 data. *Genome Research*, **17**, 377–386.
- 531 Jakubská-Busse, A. & Kadej, M. (2011) The pollination of *Epipactis* Zinn, 1757  
532 (Orchidaceae) species in Central Europe—the significance of chemical attractants, floral  
533 morphology and concomitant insects. *Acta Societatis Botanicorum Poloniae*, **80**, 49–57.
- 534 Kamenova, S., Bartley, T.J., Bohan, D.A., Boutain, J.R., Colautti, R.I., Domaizon, I., *et al.*  
535 (2017) Invasions Toolkit: current methods for tracking the spread and impact of invasive  
536 species. *Advances in Ecological Research*, **56**, 85–182.
- 537 Kapp, R.O., Davis, O.K. & King, J.E. (2000) *Pollen and Spores*. 2nd edn. American  
538 Association of Stratigraphic Palynologists Foundation, Dallas, TX.
- 539 King, C., Ballantyne, G. & Willmer, P.G. (2013) Why flower visitation is a poor proxy for  
540 pollination: measuring single visit pollen deposition, with implications for pollination  
541 networks and conservation. *Methods in Ecology and Evolution*, **4**, 811–818.
- 542 Kitson, J.J.N., Hahn, C., Sands, R.J., Straw, N.A., Evans, D.M. & Lunt, D.H. (2018)  
543 Detecting host-parasitoid interactions in an invasive Lepidopteran using nested tagging DNA  
544 metabarcoding. *Molecular Ecology*, doi: 10.1111/mec.14518.
- 545 Klein, A.-M., Vaissière, B.E., Cane, J.H., Steffan-Dewenter, I., Cunningham, S.A., Kremen,  
546 C., *et al.* (2007) Importance of pollinators in changing landscapes for world crops.  
547 *Proceedings of the Royal Society B: Biological Sciences*, **274**, 303–313.
- 548 Knop, E., Zoller, L., Ryser, R., Gerpe, C., Hörler, M. & Fontaine, C. (2017) Artificial light at  
549 night as a new threat to pollination. *Nature*, **548**, 206–209.
- 550 Krenn, H.W. (1990) Functional morphology and movements of the proboscis of Lepidoptera  
551 (Insecta). *Zoomorphology*, **110**, 105–114.
- 552 Liu, J., Shi, L., Han, J., Li, G., Lu, H., Hou, J., *et al.* (2014) Identification of species in the  
553 angiosperm family Apiaceae using DNA barcodes. *Molecular Ecology Resources*, **14**, 1231–  
554 1238.
- 555 Lopezaraiza-Mikel, M.E., Hayes, R.B., Whalley, M.R. & Memmott, J. (2007) The impact of  
556 an alien plant on a native plant–pollinator network: an experimental approach. *Ecology*  
557 *Letters*, **10**, 539–550.
- 558 Macgregor, C.J., Evans, D.M., Fox, R. & Pocock, M.J.O. (2017a) The dark side of street  
559 lighting: impacts on moths and evidence for the disruption of nocturnal pollen transport.  
560 *Global Change Biology*, **23**, 697–707.
- 561 Macgregor, C.J., Evans, D.M. & Pocock, M.J.O. (2017b) Estimating sampling completeness

- 562 of interactions in quantitative bipartite ecological networks: incorporating variation in species  
563 specialisation. *bioRxiv*, doi: 10.1101/195917.
- 564 Macgregor, C.J., Pocock, M.J.O., Fox, R. & Evans, D.M. (2015) Pollination by nocturnal  
565 Lepidoptera, and the effects of light pollution: a review. *Ecological Entomology*, **40**, 187–198.
- 566 Miyake, T. & Yahara, T. (1998) Why does the flower of *Lonicera japonica* open at dusk?  
567 *Canadian Journal of Botany*, **76**, 1806–1811.
- 568 Montoya, J.M., Pimm, S.L. & Solé, R.V. (2006) Ecological networks and their fragility.  
569 *Nature*, **442**, 259–264.
- 570 Moore, P.D., Collinson, M. & Webb, J.A. (1994) *Pollen Analysis*. 2nd edn. Wiley-Blackwell.
- 571 Oksanen, J., Blanchet, F.G., Kindt, R., Legendre, P., Minchin, P.R., O'Hara, R.B., *et al.*  
572 (2015) *vegan: Community Ecology Package*. R package version 2.3-5. [https://CRAN.R-](https://CRAN.R-project.org/package=vegan)  
573 [project.org/package=vegan](https://CRAN.R-project.org/package=vegan).
- 574 Ollerton, J., Winfree, R. & Tarrant, S. (2011) How many flowering plants are pollinated by  
575 animals? *Oikos*, **120**, 321–326.
- 576 Palmer-Jones, T., Forster, I.W. & Clinch, P.G. (1966) Observations on the pollination of  
577 Montgomery red clover (*Trifolium pratense* L.). *New Zealand Journal of Agricultural*  
578 *Research*, **9**, 738–747.
- 579 Peralta, G., Frost, C.M., Didham, R.K., Varsani, A. & Tylianakis, J.M. (2015) Phylogenetic  
580 diversity and co-evolutionary signals among trophic levels change across a habitat edge.  
581 *Journal of Animal Ecology*, **84**, 364–372.
- 582 Perkins, W.E., Estes, J.R. & Thorp, R.W. (1975) Pollination ecology of interspecific  
583 hybridization in *Verbena*. *Bulletin of the Torrey Botanical Club*, **102**, 194–198.
- 584 Pornon, A., Andalo, C., Burrus, M. & Escaravage, N. (2017) DNA metabarcoding data  
585 unveils invisible pollination networks. *Scientific Reports*, **7**, 16828.
- 586 Pornon, A., Escaravage, N., Burrus, M., Holota, H., Khimoun, A., Mariette, J., *et al.* (2016)  
587 Using metabarcoding to reveal and quantify plant-pollinator interactions. *Scientific Reports*,  
588 **6**, 27282.
- 589 Potts, S.G., Biesmeijer, J.C. & Kremen, C. (2010) Global pollinator declines: trends, impacts  
590 and drivers. *Trends in Ecology & Evolution*, **25**, 345–353.
- 591 R Core Team. (2016) *R: A language and environment for statistical computing*. R  
592 Foundation for Statistical Computing, Vienna, Austria.
- 593 Rezende, E.L., Lavabre, J.E., Guimarães, P.R., Jordano, P. & Bascompte, J. (2007) Non-

- 594 random coextinctions in phylogenetically structured mutualistic networks. *Nature*, **448**, 925–  
595 928.
- 596 Sint, D. & Traugott, M. (2016) Food Web Designer: a flexible tool to visualize interaction  
597 networks. *Journal of Pest Science*, **89**, 1–5.
- 598 Tiusanen, M., Hebert, P.D.N., Schmidt, N.M. & Roslin, T. (2016) One fly to rule them all-  
599 muscid flies are the key pollinators in the Arctic. *Proceedings of the Royal Society B:*  
600 *Biological Sciences*, **283**.
- 601 Truett, G.E., Heeger, P., Mynatt, R.L., Truett, A.A., Walker, J.A. & Warman, M.L. (2000)  
602 Preparation of PCR-quality mouse genomic DNA with hot sodium hydroxide and tris  
603 (HotSHOT). *BioTechniques*, **29**, 52, 54.
- 604 Tylianakis, J.M., Laliberté, E., Nielsen, A. & Bascompte, J. (2010) Conservation of species  
605 interaction networks. *Biological Conservation*, **143**, 2270–2279.
- 606 Vázquez, D.P., Morris, W.F. & Jordano, P. (2005) Interaction frequency as a surrogate for  
607 the total effect of animal mutualists on plants. *Ecology Letters*, **8**, 1088–1094.
- 608 Vere, N. de, Jones, L.E., Gilmore, T., Moscrop, J., Lowe, A., Smith, D., *et al.* (2017) Using  
609 DNA metabarcoding to investigate honey bee foraging reveals limited flower use despite  
610 high floral availability. *Scientific Reports*, **7**, 42838.
- 611 Vere, N. de, Rich, T.C.G., Ford, C.R., Trinder, S.A., Long, C., Moore, C.W., *et al.* (2012)  
612 DNA barcoding the native flowering plants and conifers of Wales. *PLoS One*, **7**, e37945.
- 613 Wirta, H.K., Hebert, P.D.N., Kaartinen, R., Prosser, S.W., Várkonyi, G. & Roslin, T. (2014)  
614 Complementary molecular information changes our perception of food web structure.  
615 *Proceedings of the National Academy of Sciences of the United States of America*, **111**,  
616 1885–1890.
- 617 Young, H.J. (2002) Diurnal and nocturnal pollination of *Silene alba* (Caryophyllaceae).  
618 *American Journal of Botany*, **89**, 433–440.
- 619 Zych, M., Stpicyńska, M. & Roguz, K. (2013) Reproductive biology of the Red List species  
620 *Polemonium caeruleum* (Polemoniaceae). *Botanical Journal of the Linnean Society*, **173**,  
621 92–107.
- 622
- 623

624 **Tables**

625 **Table 1: harmonised plant OTUs identified by metabarcoding and microscopy.** In  
 626 column 4, † indicates an assignment initially identified by metabarcoding, but failing to meet  
 627 the minimum read depth threshold in any sample (Table S7). In column 5, ‡ indicates an  
 628 assignment that was re-identified by comparison to pollen of species identified by  
 629 metabarcoding.

| Family         | Final identification           | Initial assignment (metabarcoding) | No. samples | Initial assignment (microscopy)            | No. samples |
|----------------|--------------------------------|------------------------------------|-------------|--------------------------------------------|-------------|
| Adoxaceae      | <i>Sambucus nigra</i>          | <i>Sambucus nigra</i>              | 3           | <i>Viburnum</i> sp.‡                       | 3           |
| Amaranthaceae  | <i>Atriplex</i> sp.            | <i>Atriplex</i> sp.                | 1           | <i>Persicaria maculosa</i> (Polygonaceae)‡ | 4           |
| Apiaceae       | Apiaceae                       | Apiaceae                           | 3           | Apiaceae                                   | 5           |
| Araliaceae     | <i>Hedera helix</i>            | <i>Hedera helix</i>                | 1           | -                                          | 0           |
| Asteraceae     | Asteraceae 1                   | Asteraceae                         | 4           | <i>Taraxacum</i> sp.‡                      | 1           |
|                | Asteraceae 2                   | Asteraceae                         | 22          | -                                          | 0           |
|                | Asteraceae 3                   | Asteraceae                         | 1           | -                                          | 0           |
|                | Anthemideae 1                  | Asteraceae                         | 1           | <i>Anthemis</i> sp.                        | 4           |
|                | Anthemideae 2                  | Asteraceae                         | 0†          | -                                          | 0           |
|                | <i>Jacobaea vulgaris</i>       | <i>Jacobaea vulgaris</i>           | 6           | <i>Cirsium</i> sp.‡                        | 5           |
| Brassicaceae   | <i>Brassica / Raphanus</i> sp. | Brassicaceae                       | 4           | <i>Lamium</i> sp. (Lamiaceae)‡             | 5           |
| Caprifoliaceae | <i>Lonicera</i> sp.            | -                                  | 0           | <i>Lonicera</i> sp.                        | 3           |

|                 |                                                       |                                |                |                                                    |    |
|-----------------|-------------------------------------------------------|--------------------------------|----------------|----------------------------------------------------|----|
| Caryophyllaceae | <i>Silene</i> sp.                                     | <i>Silene</i> sp.              | 0 <sup>†</sup> | <i>Silene</i> sp.                                  | 3  |
| Fabaceae        | <i>Ulex europaeus</i> /<br><i>Cytisus scoparius</i>   | Fabaceae                       | 10             | <i>Veronica</i> sp.<br>(Plantaginaceae)<br>‡       | 2  |
|                 | <i>Trifolium</i> sp.                                  | <i>Trifolium</i> sp.           | 9              |                                                    |    |
|                 | <i>Glycine max</i>                                    | <i>Glycine max</i>             | 2              |                                                    |    |
|                 | <i>Pisum sativum</i>                                  | <i>Pisum sativum</i>           | 3              | Asparagaceae <sup>‡</sup>                          | 5  |
| Hydrangeaceae   | <i>Hydrangea</i> sp.                                  | <i>Hydrangea</i> sp.           | 0 <sup>†</sup> | -                                                  | 0  |
|                 | <i>Philadelphus coronarius</i>                        | <i>Philadelphus coronarius</i> | 1              | <i>Fritillaria</i> sp.<br>(Liliaceae) <sup>‡</sup> | 2  |
| Lamiaceae       | Mentheae                                              | Lamiaceae                      | 2              | -                                                  | 0  |
| Malvaceae       | <i>Tilia platyphyllos</i>                             | <i>Tilia platyphyllos</i>      | 0 <sup>†</sup> | <i>Tilia</i> sp.                                   | 3  |
| Oleaceae        | <i>Ligustrum vulgare</i> /<br><i>Syringa vulgaris</i> | Oleaceae                       | 23             | -                                                  | 0  |
| Orchidaceae     | <i>Epipactis</i> sp.                                  | <i>Epipactis</i> sp.           | 2              | -                                                  | 0  |
| Papaveraceae    | <i>Papaver</i> sp.                                    | <i>Papaver</i> sp.             | 1              | Ericaceae <sup>‡</sup>                             | 1  |
| Polemoniaceae   | <i>Polemonium caeruleum</i>                           | <i>Polemonium caeruleum</i>    | 0 <sup>†</sup> | -                                                  | 0  |
| Ranunculaceae   | <i>Ranunculus</i> sp.                                 | <i>Ranunculus</i> sp.          | 0 <sup>†</sup> | <i>Helleborus</i> sp. <sup>‡</sup>                 | 1  |
| Rosaceae        | <i>Prunus</i> sp.                                     | <i>Prunus</i> sp.              | 1              | Rosaceae                                           | 6  |
|                 | <i>Rubus</i> sp.                                      | <i>Rubus</i> sp.               | 26             | <i>Rubus</i> sp.                                   | 13 |

|                  |                            |                                                  |    |                                              |    |
|------------------|----------------------------|--------------------------------------------------|----|----------------------------------------------|----|
|                  | <i>Filipendula ulmaria</i> | <i>Filipendula ulmaria</i>                       | 1  | -                                            | 0  |
| Rubiaceae        | <i>Galium aparine</i>      | <i>Galium aparine</i>                            | 1  | <i>Galium</i> sp.                            | 1  |
| Scrophulariaceae | <i>Buddleja davidii</i>    | <i>Buddleja davidii</i>                          | 19 | <i>Buddleja</i> sp.                          | 20 |
| Solanaceae       | <i>Solanum tuberosum</i>   | <i>Solanum</i> sp. /<br><i>Solanum tuberosum</i> | 7  | <i>Viola</i> sp.<br>(Violaceae) <sup>†</sup> | 1  |
| Verbenaceae      | <i>Verbena officinalis</i> | <i>Verbena officinalis</i>                       | 1  | -                                            | 0  |

630

631

632

633 **Table 2: Summary of basic interaction data for each method.** The samples were  
634 duplicate subsets of the total sample, and each comprised 311 individuals of 41 species.  
635 Plant types for metabarcoding were operational taxonomic units (OTUs; identified by a  
636 BLAST search against a curated reference database) and for microscopy were morphotypes  
637 (identified using identification keys). Percentages in brackets are of the relevant sub-sample.

|                                                          | Metabarcoding | Microscopy |
|----------------------------------------------------------|---------------|------------|
| No. pollen-carrying moths                                | 107 (34.4%)   | 70 (22.5%) |
| No. pollen-carrying species                              | 15 (36.6%)    | 17 (41.5%) |
| No. plant types identified                               | 26            | 20         |
| Plant types initially identified to species level        | 11 (42.3%)    | 1 (5%)     |
| Plant types initially identified to at least genus level | 17 (65.4%)    | 16 (80%)   |
| Plant types detected on one moth only                    | 10 (38.5%)    | 5 (25%)    |
| No. moths carrying pollen from >1 plant types            | 36 (11.6%)    | 13 (4.2%)  |
| No. unique interactions (total no. interactions)         | 62 (155)      | 52 (88)    |

638

639

640

641

642

643

644

645



646

647

648

649

## 650 **Figure legends**

651

### 652 **Figure 1: visual summary of the two methods applied to detect and identify pollen**

653 **transport by moths.** Full methods are in Appendix S1. For metabarcoding, the steps shown  
654 are: 1. Field sampling of moths. 2. Excise proboscis. 3. Remove pollen by shaking. 4. Extract  
655 DNA by HotSHOT method. 5. Amplify DNA by 3-step PCR protocol. 6. Sequence DNA. 7  
656 Assign DNA sequence identities. 8. Analyse interactions and construct networks. For  
657 microscopy, the steps shown are: A. Field sampling of moths. B. Swab proboscis with  
658 fuchsin-stained gel. C. Mount gel on microscope slide. D. Identify and count pollen under  
659 microscope. E. Analyse interactions and construct networks.

660

### 661 **Figure 2: comparisons between DNA metabarcoding and microscopy approaches of:**

662 proportion of (a) individual moths and (b) moth species found to be carrying pollen; number  
663 of pollen types detected for (c) individual moths and (d) moth species; proportion of  
664 individual moths carrying more than one pollen type (e); and estimated number of pollen  
665 types per moth species (f). For (c), (d) and (f), only pollen-carrying individuals and moth  
666 species were included. Significance indicates Likelihood Ratio Test for detection method in  
667 GLMMs (\* :  $P < 0.05$ ; \*\* :  $P < 0.01$ ; \*\*\*  $P < 0.001$ ). Error bars show 95% confidence intervals.

668

### 669 **Figure 3: networks constructed using DNA metabarcoding and microscopy from**

670 **replicated, matched samples of moths.** Species are colour-coded by family (see key);  
671 families appear from top to bottom in the order listed. For moths, bar height indicates relative  
672 species abundance, and link width indicates number of individuals carrying pollen of each  
673 plant species. For plants, bar height indicates number of individual moths on which each  
674 pollen type was detected, and link width indicates proportion of those moths belonging to  
675 each moth species.

676

### 677 **Figure 4: network metrics calculated for each detection method** (Table S6). Solid lines

678 connect metrics for fully-resolved data, dashed lines connect metrics when plant species  
679 were aggregated at the family level.

680

681 **Figure 5: estimated change in investment as number of samples increases for**  
682 metabarcoding and microscopy methods. Lines are hypothetical and not based on formal  
683 costing of methods.

684

685

686 **Figures**

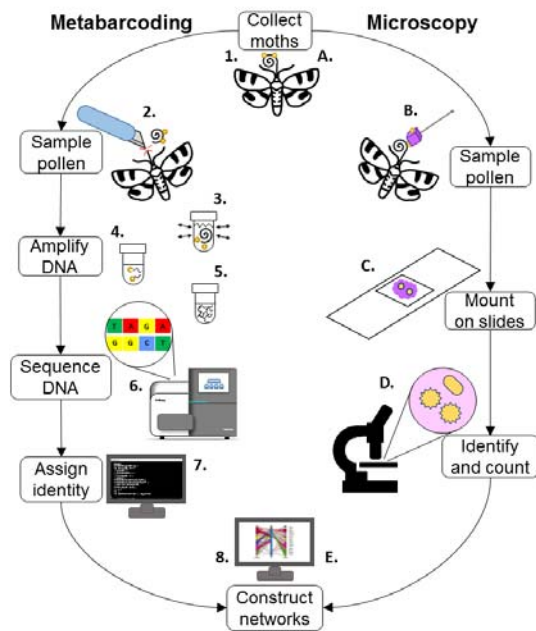

687

688 **Figure 1: visual summary of the two methods applied to detect and identify pollen**

689 **transport by moths.** Full methods are in Appendix S1. For metabarcoding, the steps shown  
690 are: 1. Field sampling of moths. 2. Excise proboscis. 3. Remove pollen by shaking. 4. Extract  
691 DNA by HotSHOT method. 5. Amplify DNA by 3-step PCR protocol. 6. Sequence DNA. 7  
692 Assign DNA sequence identities. 8. Analyse interactions and construct networks. For  
693 microscopy, the steps shown are: A. Field sampling of moths. B. Swab proboscis with  
694 fuchsin-stained gel. C. Mount gel on microscope slide. D. Identify and count pollen under  
695 microscope. E. Analyse interactions and construct networks.

696

697

698

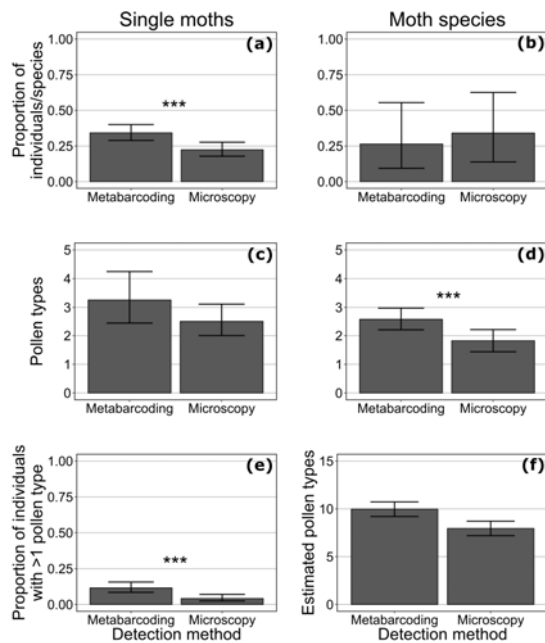

699

700 **Figure 2: comparisons between DNA metabarcoding and microscopy approaches of:**  
701 proportion of (a) individual moths and (b) moth species found to be carrying pollen; number  
702 of pollen types detected for (c) individual moths and (d) moth species; proportion of  
703 individual moths carrying more than one pollen type (e); and estimated number of pollen  
704 types per moth species (f). For (c), (d) and (f), only pollen-carrying individuals and moth  
705 species were included. Significance indicates Likelihood Ratio Test for detection method in  
706 GLMMs (\* :  $P < 0.05$ ; \*\* :  $P < 0.01$ ; \*\*\*  $P < 0.001$ ). Error bars show 95% confidence intervals.

707

708

709

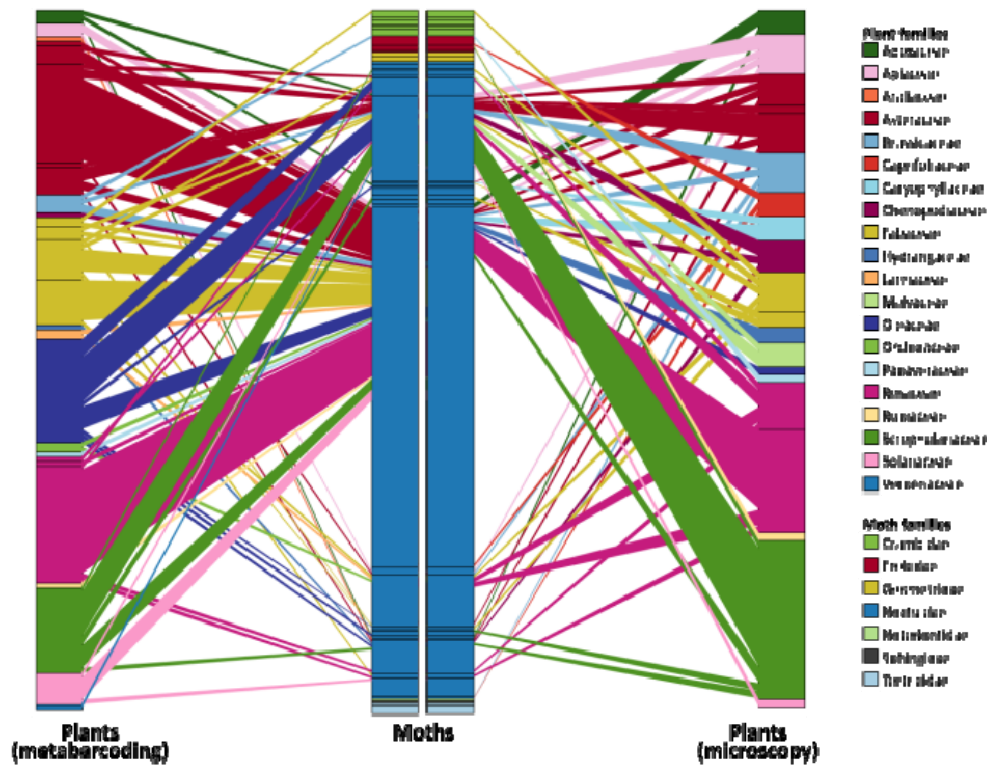

710

711 **Figure 3: networks constructed using DNA metabarcoding and microscopy from**  
712 **replicated, matched samples of moths.** Species are colour-coded by family (see key);  
713 families appear from top to bottom in the order listed. For moths, bar height indicates relative  
714 species abundance, and link width indicates number of individuals carrying pollen of each  
715 plant species. For plants, bar height indicates number of individual moths on which each  
716 pollen type was detected, and link width indicates proportion of those moths belonging to  
717 each moth species.

718

719

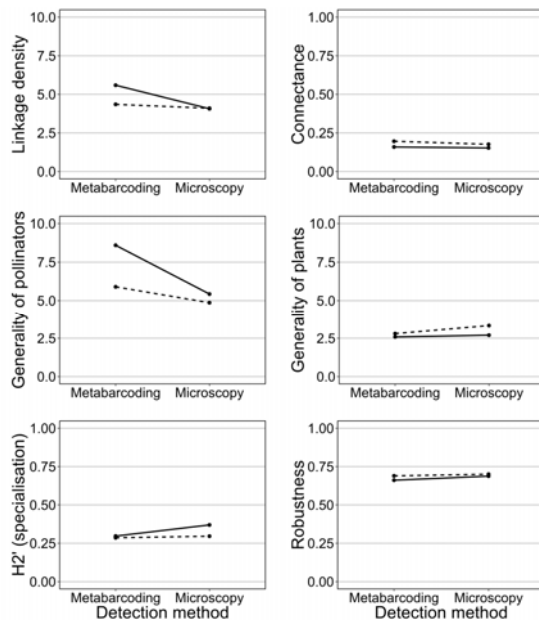

720

721 **Figure 4: network metrics calculated for each detection method** (Table S6). Solid lines  
722 connect metrics for fully-resolved data, dashed lines connect metrics when plant species  
723 were aggregated at the family level.

724

725

726

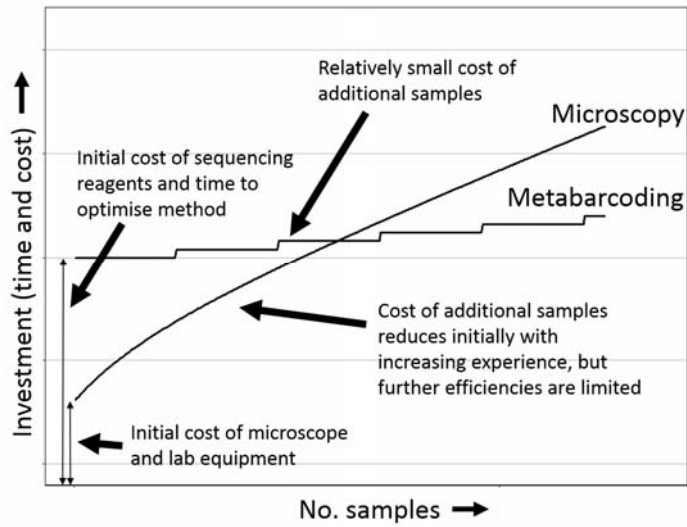

727

728

729 **Figure 5: estimated change in investment as number of samples increases for**  
730 **metabarcoding and microscopy methods. Lines are hypothetical and not based on formal**  
731 **costing of methods.**

732
